# Supplementary material for: A ruthenium(ii) complex with environment-responsive dual emission and its application in the detection of cysteine/homocysteine
Source: Royal Society of Chemistry journal article supplement (doi:10.1039/c2dt31180a), 2012-01-01
Supplement: c2dt31180a.pdf [file c2dt31180a.pdf]

## Electronic Supplementary Material (ESM) for Publication:

A ruthenium(II) complex with environment-responsive dual emission and its application in the detection of Cysteine/Homocysteine

Huili Chen,<sup>\*ab</sup> Xiaokai Li,<sup>a</sup> Yanbo Wu,<sup>a</sup> Wei Gao<sup>a</sup> and Ruichun Bai<sup>a</sup>

<sup>a</sup>Institute of Molecular Science, Key Laboratory of Chemical Biology and Molecular Engineering of Ministry of Education, Shanxi University, Taiyuan 030006, P.R. China

<sup>b</sup>State Key Laboratory of Coordination Chemistry, Nanjing University, Nanjing 210093, P.R. China

Correspondence.E-mail: [huilichen@sxu.edu.cn](mailto:huilichen@sxu.edu.cn) (H.Chen)

### S1. Supplementary results

**Fig.S1** The absorption and emission spectra of **1** and **2** in DMF.

**Fig.S2** The emission spectra of **1** in different solvent. For compare, the intensity in DMF,DMSO,CH<sub>3</sub>CN were divided by 800, while the intensity in EtOH and HEPES buffer were divided by 50.

**Fig.S3** The absorption and emission spectra of **1**, **1**-Cys and **2** in HEPES buffer.

**Fig. S4** The ESI mass spectra of **1**, **1**-Cys and **1**-Hcy in HEPES buffer.

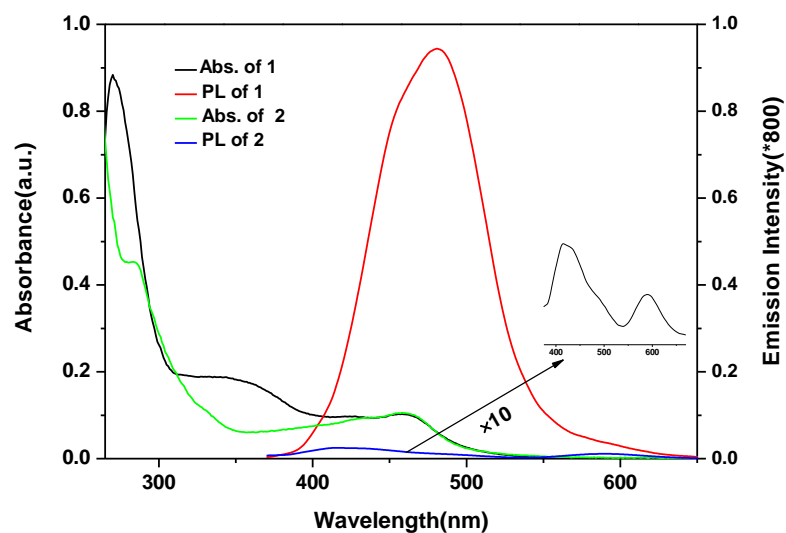

**Fig.S1** The absorption and emission spectra of **1** and **2** in DMF.

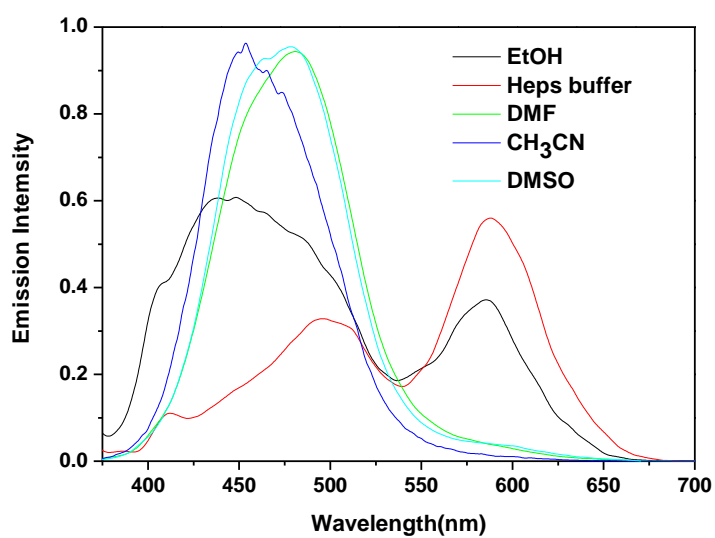

**Fig.S2** The emission spectra of **1** in different solvent. For compare, the intensity in DMF,DMSO,CH<sub>3</sub>CN were divided by 800, while the intensity in EtOH and HEPES buffer were divided by 50.

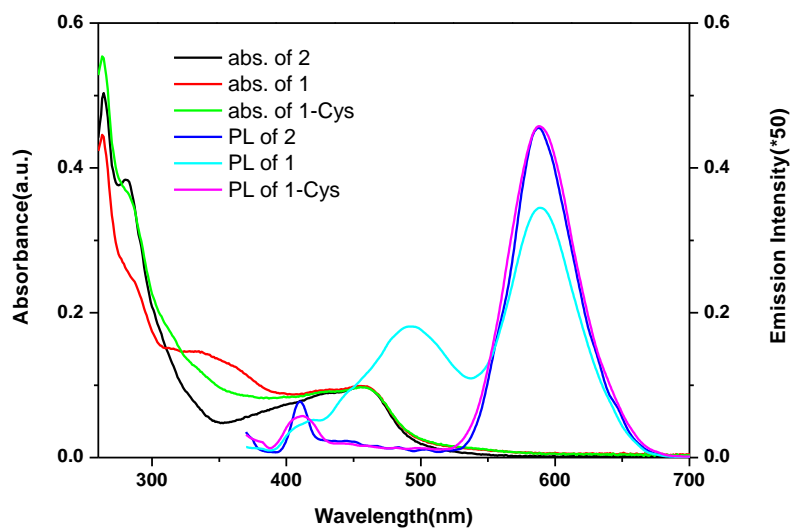

**Fig.S3** The absorption and emission spectra of **1**, **1-Cys** and **2** in HEPES buffer.

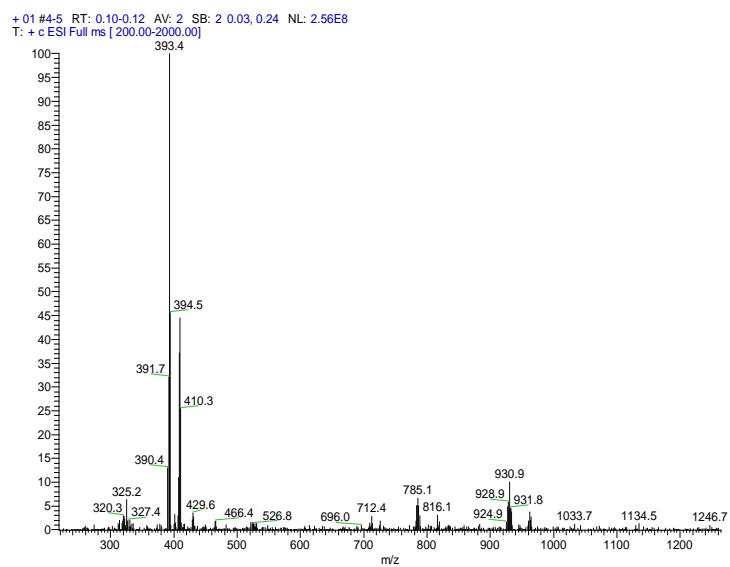

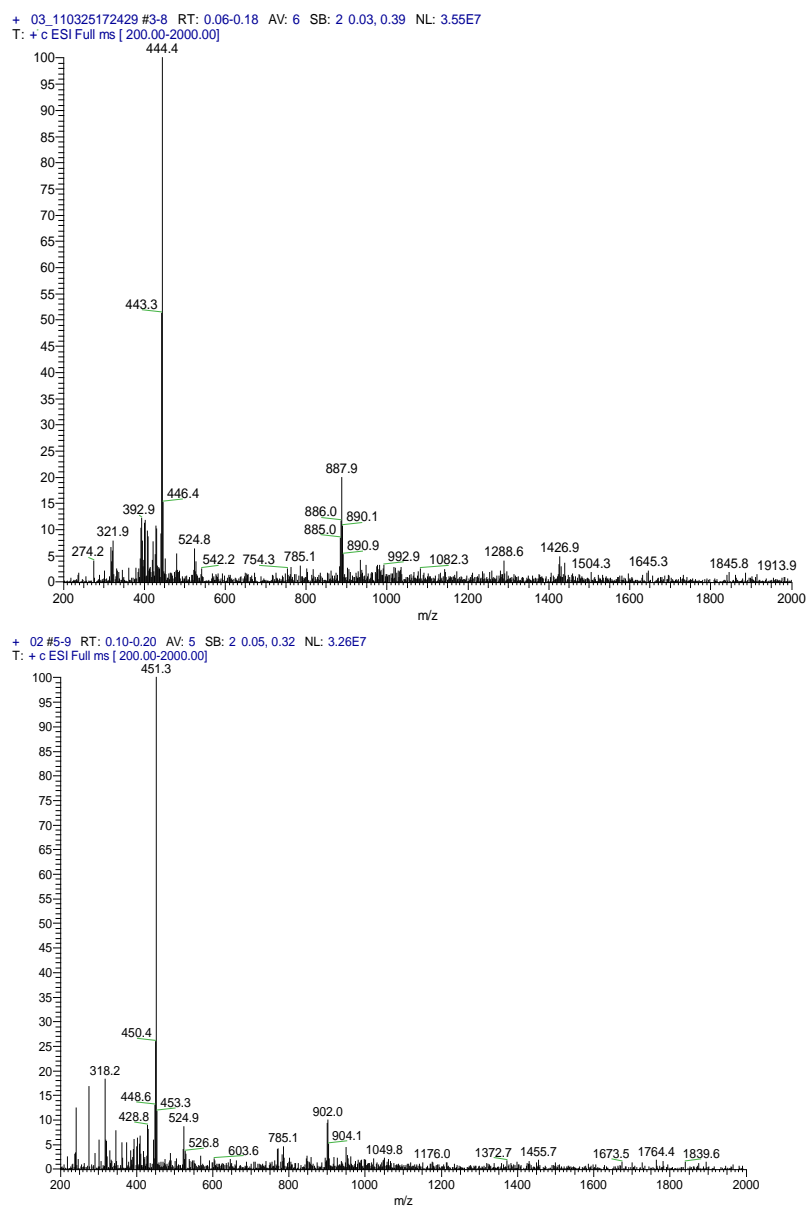

**Fig. S4** The ESI mass spectra of of **1**, **1-Cys** and **1-Hcy** in HEPES buffer.
